# Supplementary material for: A two-dimensionally microporous thiostannate with superior Cs+ and Sr2+ ion-exchange property
Source: Royal Society of Chemistry journal article supplement (doi:10.1039/c5ta00566c), 2015-01-01
Supplement: c5ta00566c1.pdf [file c5ta00566c1.pdf]

Supporting Information

## A two-dimensionally microporous thiostannate with superior Cs<sup>+</sup> and Sr<sup>2+</sup> ion-exchange property

Xing-Hui Qi, Ke-Zhao Du, Mei-Ling Feng\*, Jian-Rong Li, Cheng-Feng Du, Bo Zhang and Xiao-Ying Huang

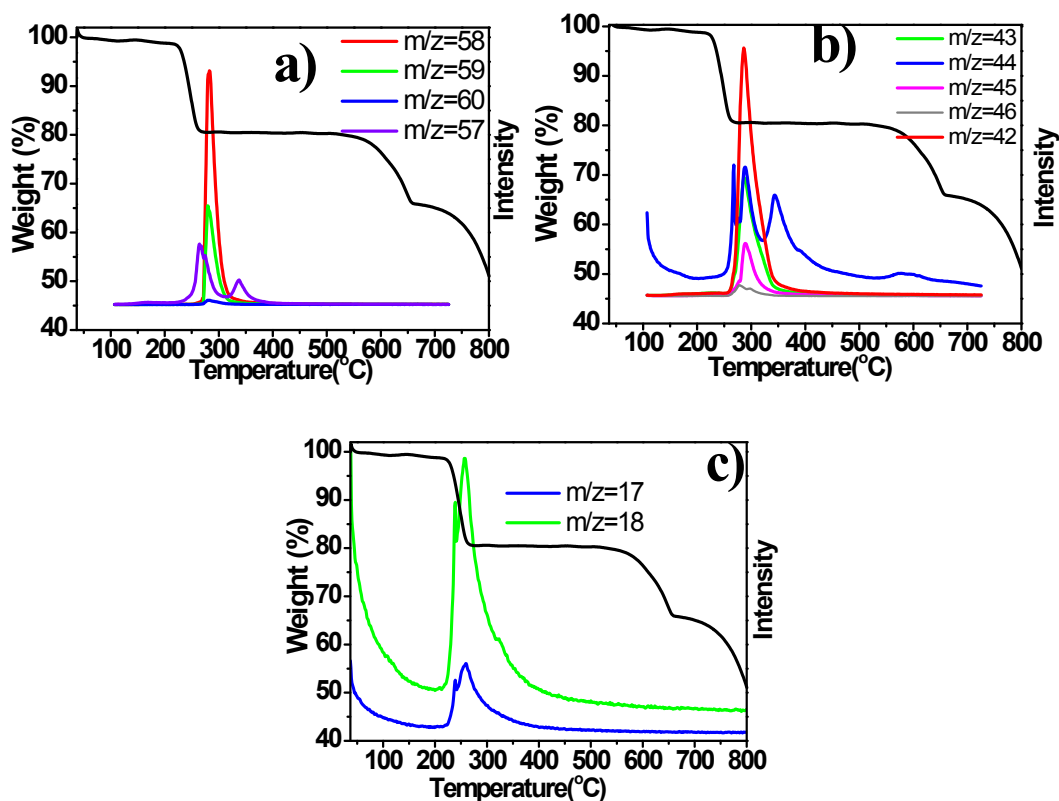

**Fig. S1.** The TG-MS spectra of FJSM-SnS crystals with the characteristic mass data of Me<sub>3</sub>NH<sup>+</sup> (a), Me<sub>2</sub>NH<sub>2</sub><sup>+</sup> (b) and H<sub>2</sub>O (c).

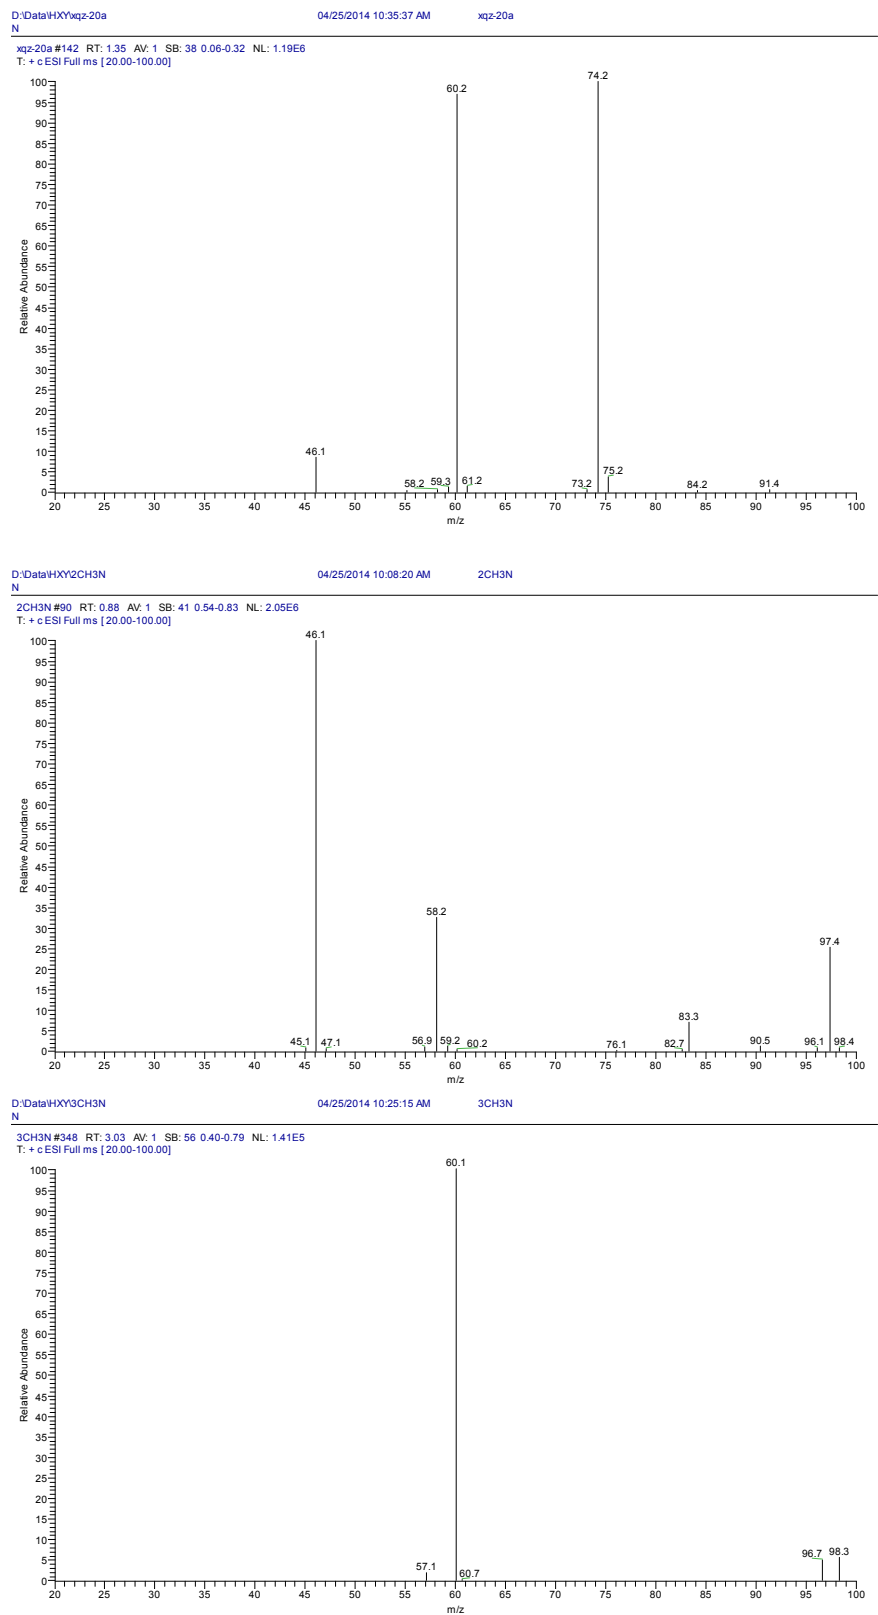

Fig. S2. Mass spectra of solution after solvetherml reaction (top), dimethylamine solution (middle) and trimethylamine solution (bottom).

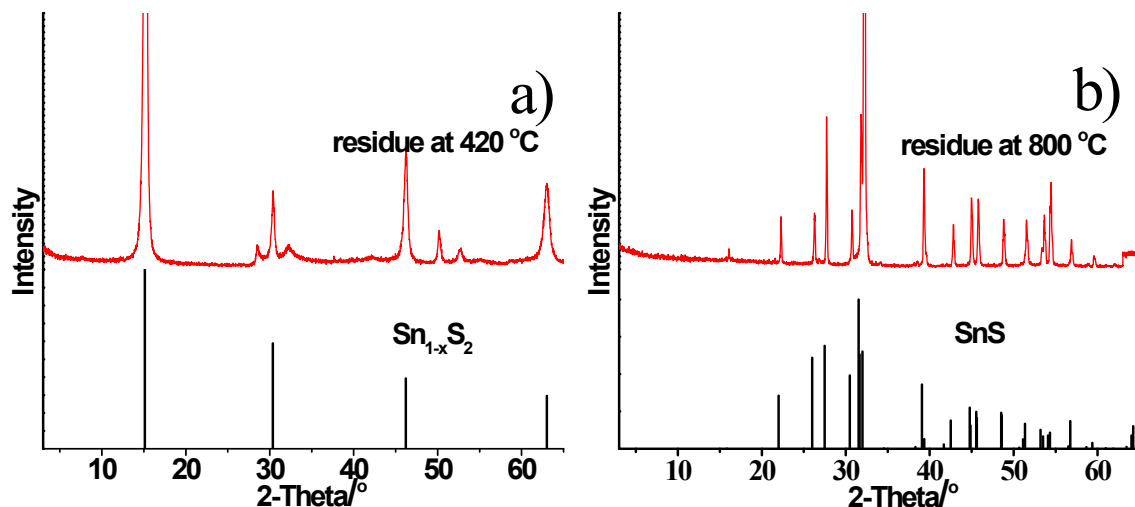

Fig. S3. The PXR D patterns of TG residues at 420 °C (a) and 800 °C (b) compared to the simulated  $\text{Sn}_{1-x}\text{S}_2$  and SnS patterns, respectively.

The thermal stability of FJSM-SnS has been studied. Two cyclic heat treatments at 100 °C have been carried out, Figure S4a. The PXR D patterns are comparable to that of the pristine after heat treatments, Figure S4b, suggesting the structural stability of FJSM-SnS at the temperature range of ion-exchange experiments. In fact, the ability of  $\text{Cs}^+$  removal is even improved a little after the heat treatment, Table S1.

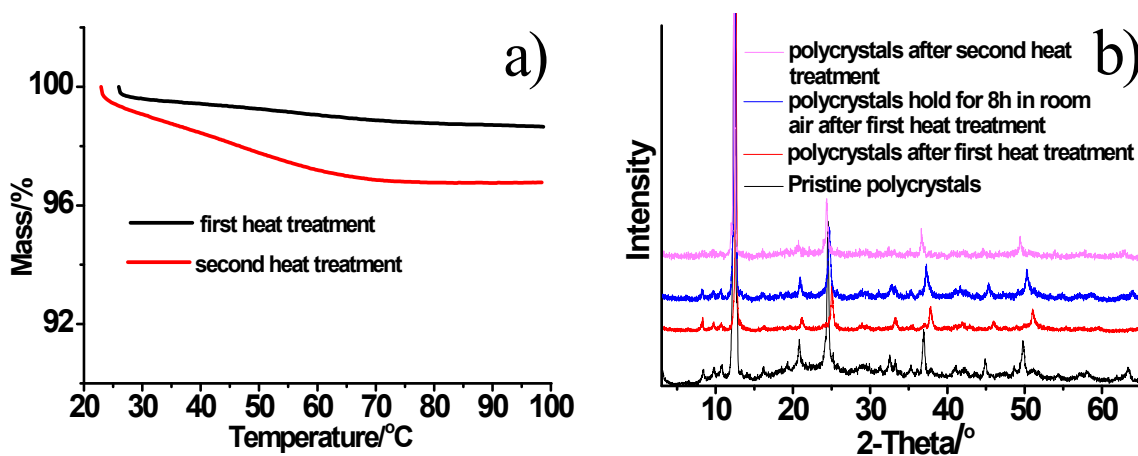

Fig. S4. a) The two cyclic heat treatments with 45 min isothermal time; b) the related PXR D patterns after heat treatment are in good agreement with that of the pristine FJSM-SnS crystals.

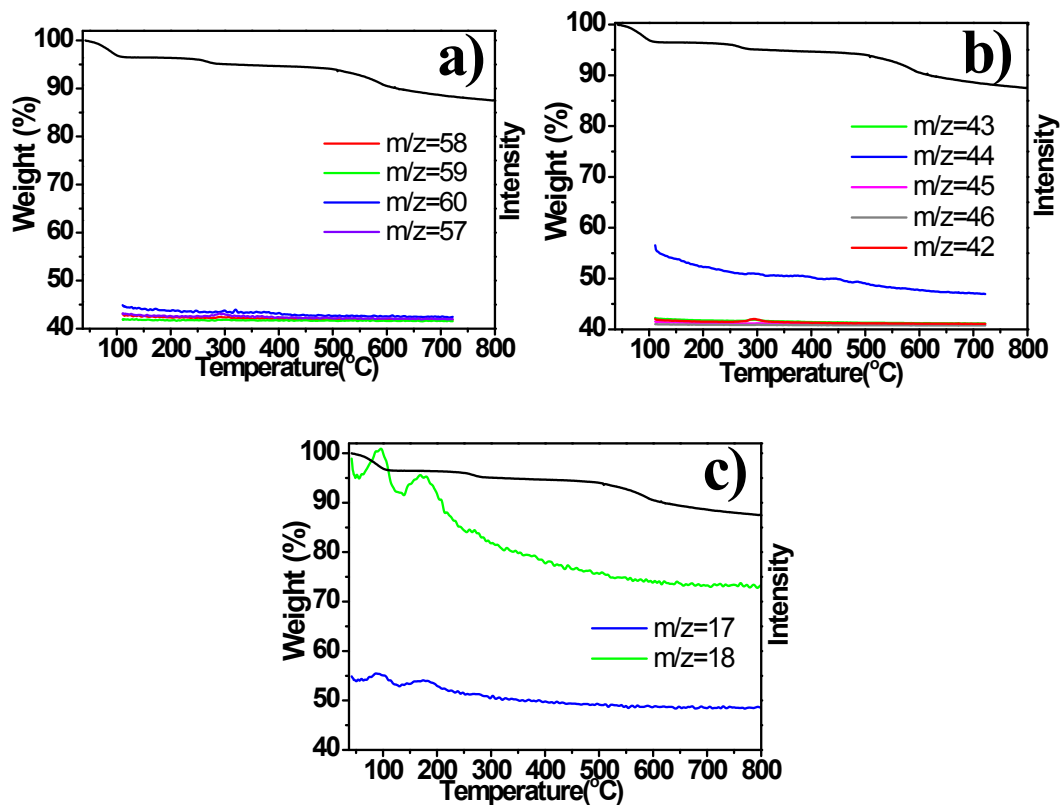

Fig. S5. The TG-MS spectra of the FJSM-SnS-Cs crystals with the characteristic mass data of  $\text{Me}_3\text{NH}^+$  (a),  $\text{Me}_2\text{NH}_2^+$  (b) and  $\text{H}_2\text{O}$  (c).

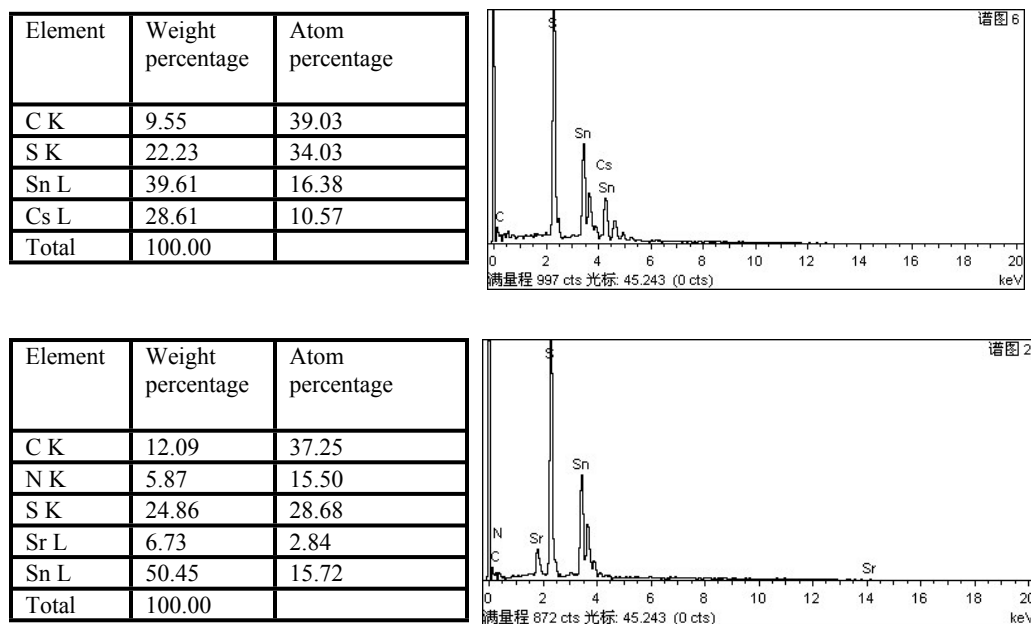

Fig. S6. The EDS diagrams and data for  $\text{Cs}^+$  and  $\text{Sr}^{2+}$ -exchanged products, respectively. The results showed the ratio of Sn:Cs was close to 3:1.93 while that of Sn:Sr was 3:0.54, which further verified the large ion-exchange capacity for  $\text{Cs}^+$  close to the theoretical one and smaller ion-exchange capacity for  $\text{Sr}^{2+}$ .

**Table S1.** The effect of heat treatment on the ion-exchange performance.

|                               | $m$ / mg | $V$ / mL | $C_o$ / ppm | $C_f$ / ppm | $K_d$ / (mL/g) | Cs <sup>+</sup> Removal rate/% |
|-------------------------------|----------|----------|-------------|-------------|----------------|--------------------------------|
| FJSM-SnS                      | 18.3     | 18       | 1.194       | 0.2805      | 3257           | 76.5                           |
| FJSM-SnS after heat treatment | 18.3     | 18       | 0.9004      | 0.1873      | 3807           | 79.2                           |

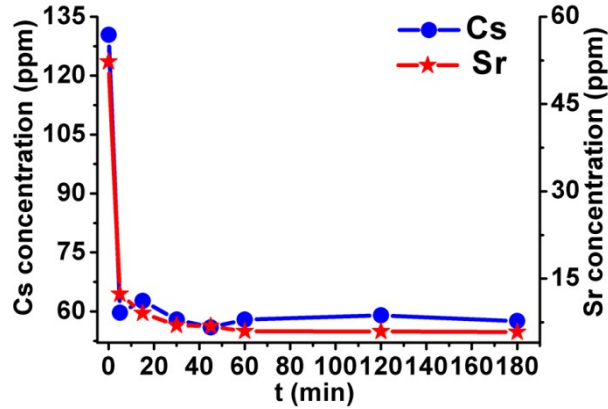

**Fig. S7.** Kinetics of Cs<sup>+</sup> and Sr<sup>2+</sup> ion-exchange of FJSM-SnS at room temperature plotted as the Cs<sup>+</sup> and Sr<sup>2+</sup> ion concentration (ppm) vs the time  $t$  (min), respectively. The solutions of Cs<sup>+</sup> (130.4 ppm) and Sr<sup>2+</sup> (52.29 ppm) were prepared individually at neutral condition and V:m is 1000 mL/g ( $V = 10$  mL,  $m = 10$  mg). All the samples were carried out under 16-19 °C under magnetic stirring. Then we took one sample one time at different time of ion-exchange.

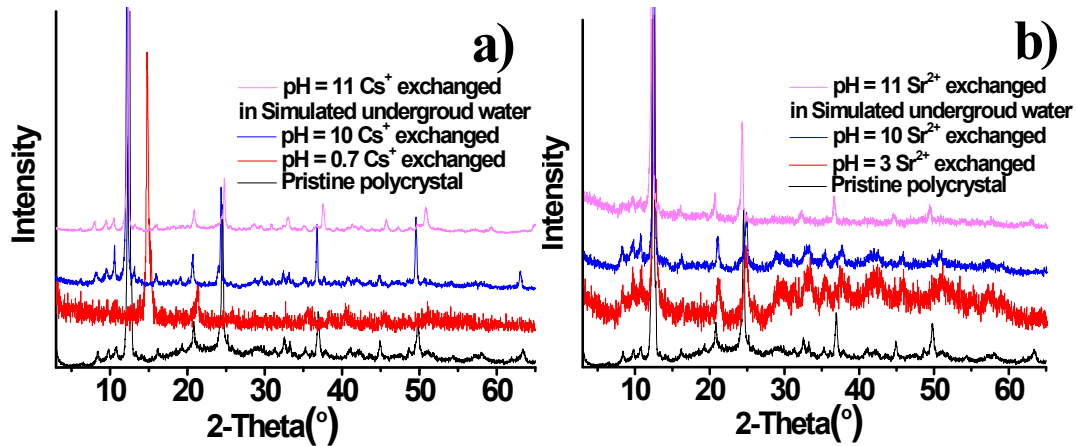

**Fig. S8.** PXRD patterns of the Cs<sup>+</sup> and Sr<sup>2+</sup>-exchanged materials at extreme pH conditions.

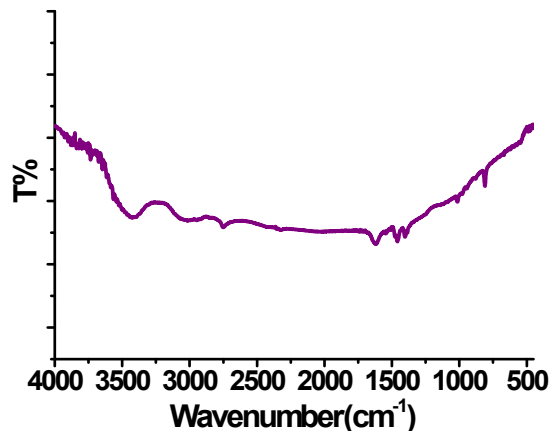

Fig. S9. IR spectrum of FJSM-SnS.

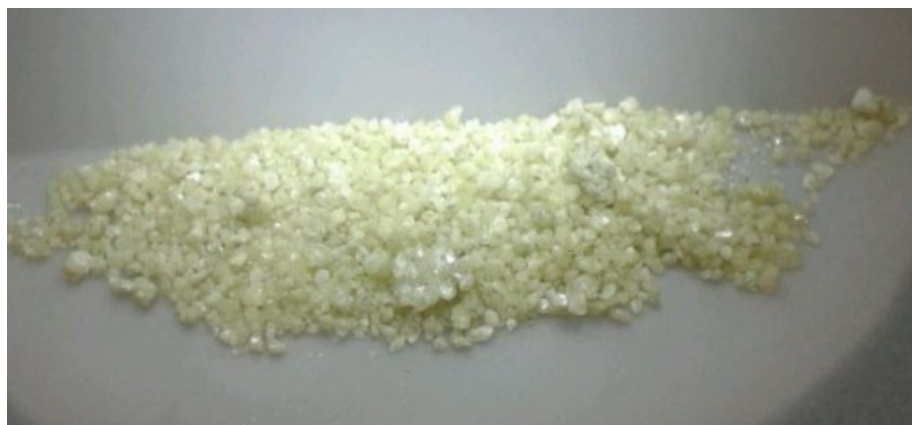

Fig. S10. Photograph of the crystals of as-synthesized FJSM-SnS in a typical large-scale synthesis.

**Table S2.** The ion-exchange experiments in simulated groundwater.

| Metal cations                           | Conditions                                 | $C_o$ / ppm                   | $C_f$ / ppm | $K_d$ / (mL/g)          |                         |
|-----------------------------------------|--------------------------------------------|-------------------------------|-------------|-------------------------|-------------------------|
| $Cs^+ + Ca^{2+} + Mg^{2+} + Na^+ + K^+$ | pH~7,<br>$V:m \sim 100$ mL/g               | 2.056 (Cs)                    | 0.6535 (Cs) | $2.15 \times 10^2$ (Cs) |                         |
|                                         |                                            | 8.227 (Ca)                    | 0.4390 (Ca) | $1.77 \times 10^3$ (Ca) |                         |
|                                         |                                            | 7.646 (Mg)                    | 2.075 (Mg)  | $2.68 \times 10^2$ (Mg) |                         |
|                                         |                                            | 6.367 (K)                     | 5.130 (K)   | 24 (K)                  |                         |
|                                         | pH~7,<br>$V:m \sim 1000$ mL/g              | 2.159 (Cs)                    | 1.652 (Cs)  | $3.07 \times 10^2$ (Cs) |                         |
|                                         |                                            |                               |             |                         |                         |
|                                         | pH~11,<br>$V:m \sim 100$ mL/g              | 1.984 (Cs)                    | 0.8013 (Cs) | $1.48 \times 10^2$ (Cs) |                         |
|                                         |                                            | 7.878 (Ca)                    | 0.5483 (Ca) | $1.34 \times 10^3$ (Ca) |                         |
|                                         |                                            | 8.315 (Mg)                    | 1.853 (Mg)  | $3.49 \times 10^2$ (Mg) |                         |
|                                         |                                            | 5.574 (K)                     | 5.481 (K)   | 1.7 (K)                 |                         |
|                                         | $Sr^{2+} + Ca^{2+} + Mg^{2+} + Na^+ + K^+$ | pH~7,<br>$V:m \sim 1000$ mL/g | 6.84 (Sr)   | 1.51 (Sr)               | $3.53 \times 10^3$ (Sr) |
|                                         |                                            |                               | 7.15 (Ca)   | 1.98 (Ca)               | $2.61 \times 10^3$ (Ca) |
| 9.7 (Mg)                                |                                            |                               | 3.71 (Mg)   | $1.61 \times 10^3$ (Mg) |                         |
| 9.1 (K)                                 |                                            |                               | 8.69 (K)    | 47 (K)                  |                         |
| pH~11,<br>$V:m \sim 1000$ mL/g          |                                            | 6.22 (Sr)                     | 3.81 (Sr)   | $6.32 \times 10^2$ (Sr) |                         |
|                                         |                                            | 5.32 (Ca)                     | 4.55 (Ca)   | $1.70 \times 10^2$ (Ca) |                         |
|                                         |                                            | 7.53 (Mg)                     | 5.82 (Mg)   | $2.94 \times 10^2$ (Mg) |                         |
|                                         |                                            |                               |             |                         |                         |

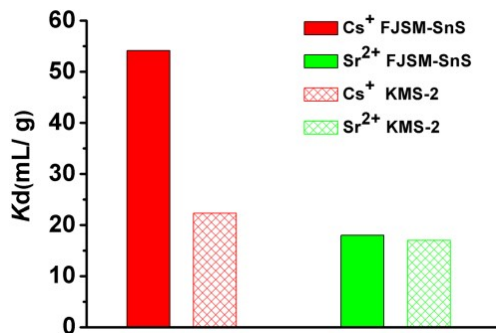

**Fig. S11.** The  $K_d$  of  $\text{Cs}^+$  and  $\text{Sr}^{2+}$  in the simulated nuclear waste with the coexistence of 5 mol/L  $\text{Na}^+$  ion and dilute  $\text{Cs}^+$  or  $\text{Sr}^{2+}$  ions (KMS-2: Ref. 3,  $C_0 = 5.314$  ppm for  $\text{Cs}^+$ ,  $C_0 = 12.39$  ppm for  $\text{Sr}^{2+}$ ,  $V:m = 1000$  mL/g, at 65 °C).

The ion-exchange performances in the simulated nuclear waste were explored. The solution with the coexistence of 5 mol/L  $\text{Na}^+$  ion and dilute  $\text{Cs}^+$  or  $\text{Sr}^{2+}$  ions was used to simulate nuclear waste. In the simulated nuclear waste, there are more than 10000-fold excess of  $\text{Na}^+$  than  $\text{Cs}^+$  and  $\text{Sr}^{2+}$ . The ion-exchange performances of FJSM-SnS could be greatly affected by the excessive  $\text{Na}^+$  as KMS-1 and KMS-2.

**Table S3.** The competitive ion-exchange experiments of alkali metal cations. (mole ratio,  $\text{Cs}^+ : \text{Rb}^+ : \text{K}^+ : \text{Na}^+ = 1 : 10 : 10 : 10$ )

| Metal cations | $C_0$ / ppm<br>(initial concentration) | $C_f$ / ppm<br>(equilibrium concentration) | $K_d$ / (mL/g)<br>(distribution coefficient) |
|---------------|----------------------------------------|--------------------------------------------|----------------------------------------------|
| $\text{Na}^+$ | 80.26                                  | 71.08                                      | $1.3 \times 10^2$                            |
| $\text{K}^+$  | 129.3                                  | 117.83                                     | $0.97 \times 10^2$                           |
| $\text{Rb}^+$ | 257.7                                  | 230                                        | $1.20 \times 10^2$                           |
| $\text{Cs}^+$ | 47.32                                  | 30.93                                      | $5.30 \times 10^2$                           |

**Table S4.** The competitive ion-exchange experiments of alkali-earth metal cations.  
(mole ratio, Sr<sup>2+</sup>: Mg<sup>2+</sup>: Ca<sup>2+</sup>: Ba<sup>2+</sup> = 1: 10: 10: 10)

| Metal cations    | $C_o$ / ppm<br>(initial concentration) | $C_f$ / ppm<br>(equilibrium concentration) | $K_d$ / (mL/g)<br>(distribution coefficient) |
|------------------|----------------------------------------|--------------------------------------------|----------------------------------------------|
| Mg <sup>2+</sup> | 7.25                                   | 1.96                                       | $2.67 \times 10^3$                           |
| Ca <sup>2+</sup> | 12.14                                  | 2.44                                       | $3.98 \times 10^3$                           |
| Sr <sup>2+</sup> | 3.4                                    | 0.48                                       | $6.08 \times 10^3$                           |
| Ba <sup>2+</sup> | 36.8                                   | 4.61                                       | $6.98 \times 10^3$                           |

**Table S5.** The data in the ion-exchange chromatographic column experiment

| Metal cations    | <i>Volume/Bed<br/>volume</i> | $C_o$ / ppm | $C_f$ / ppm        | $C_f$ / pg·mL <sup>-1</sup> |
|------------------|------------------------------|-------------|--------------------|-----------------------------|
| Cs <sup>+</sup>  | 53.76344                     | 12.03       | 0.4648             | $4.65 \times 10^5$          |
|                  | 89.60573                     | 12.03       | 0.3941             | $3.94 \times 10^5$          |
|                  | 143.3692                     | 12.03       | 0.4081             | $4.08 \times 10^5$          |
|                  | 179.2115                     | 12.03       | 0.4053             | $4.05 \times 10^5$          |
|                  | 232.9749                     | 12.03       | 0.4043             | $4.04 \times 10^5$          |
|                  | 268.8172                     | 12.03       | 0.4109             | $4.11 \times 10^5$          |
|                  | 358.4229                     | 14.52       | 0.2205             | $2.21 \times 10^5$          |
|                  | 465.9498                     | 14.52       | 0.17               | $1.70 \times 10^5$          |
|                  | 555.5556                     | 14.52       | 0.1996             | $2.00 \times 10^5$          |
|                  | 663.0824                     | 14.52       | 0.2456             | $2.46 \times 10^5$          |
|                  | 720.4301                     | 14.52       | 0.2709             | $2.71 \times 10^5$          |
| 867.3835         | 14.52                        | 0.3568      | $3.57 \times 10^5$ |                             |
| Sr <sup>2+</sup> | 53.76344                     | 5.98        | 0.14               | $1.40 \times 10^5$          |
|                  | 89.60573                     | 5.98        | 0.065              | $6.50 \times 10^4$          |
|                  | 143.3692                     | 5.98        | 0.033              | $3.30 \times 10^4$          |
|                  | 179.2115                     | 5.98        | 0.033              | $3.30 \times 10^4$          |
|                  | 232.9749                     | 5.98        | 0.018              | $1.80 \times 10^4$          |
|                  | 268.8172                     | 5.98        | 0.017              | $1.70 \times 10^4$          |
|                  | 358.4229                     | 5.98        | 0.00853            | $8.53 \times 10^3$          |
|                  | 465.9498                     | 5.98        | 0.00535            | $5.35 \times 10^3$          |
|                  | 555.5556                     | 5.98        | 0.01067            | $1.07 \times 10^4$          |
|                  | 663.0824                     | 5.98        | 0.00811            | $8.11 \times 10^3$          |
|                  | 720.4301                     | 5.98        | 0.00581            | $5.81 \times 10^3$          |
| 867.3835         | 5.98                         | 0.00749     | $7.49 \times 10^3$ |                             |
